# Supplementary material for: Lanthanoid single-ion magnets with the LnN10 coordination geometry
Source: Royal Society of Chemistry journal article supplement (doi:10.1039/c6cc01695b), 2016-01-01
Supplement: c6cc01695b1.pdf [file c6cc01695b1.pdf]

Electronic Supplementary Information (ESI):

## Lanthanoid Single-Ion Magnets with LnN<sub>10</sub> Coordination Geometry

Zhong-Xia Jiang,<sup>‡</sup> Jun-Liang Liu,<sup>‡</sup> Yan-Cong Chen, Jiang Liu, Jian-Hua Jia\* and Ming-Liang Tong\*

MOE Key Lab of Bioinorganic and Synthetic Chemistry, School of Chemistry & Chemical Engineering, Sun Yat-Sen University, Guangzhou 510275, P. R. China.

E-mail: [jiajh3@mail.sysu.edu.cn](mailto:jiajh3@mail.sysu.edu.cn); [tongml@mail.sysu.edu.cn](mailto:tongml@mail.sysu.edu.cn).

<sup>‡</sup> These authors contributed equally to this work.

### CONTENT:

**Experimental section:** materials and physical measurements, X-ray structure determination and synthesis.

**Figure S1.** Experimental and simulated powder X-ray diffraction (PXRD) patterns.

**Figure S2.** The dc field dependence of the relaxation time at 1.8K.

**Figure S3.** The plots of the relaxation time  $\tau$  vs.  $T$  on a log-log scale.

**Figure S4.** The plots of the relaxation time  $\tau$  vs.  $T$  with consideration of the direct and Raman processes.

**Figure S5.** The plots of the relaxation time  $\tau$  vs.  $T$  with consideration of the direct, Raman, and Orbach processes.

**Table S1.** Crystallographic Data and Structural Refinements.

**Table S2.** Selected bond lengths (Å) and bond angles (°) for **1**.

**Table S3.** Selected bond lengths (Å) and bond angles (°) for **2**.

**Table S4.** Lanthanide geometry analysis by using Continuous Shape Measurements (CShM).

**Table S5.** Energy levels and eigenstates extracted from the  $\chi_m T-T$  and  $M-H$  data.

## EXPERIMENTAL SECTION

**Materials and Physical Measurements.** The ligand was synthesized as literature described.<sup>1</sup> Metal salts and other reagents were commercially available and used as received without further purification. The C, H, N and S microanalyses were carried out with an Elementar Vario-EL CHNS elemental analyzer. X-ray powder diffraction (XRPD) intensities for polycrystalline samples were measured at 293 K on Bruker D8 Advance Diffractometer (Cu-K $\alpha$ ,  $\lambda$  = 1.54056 Å) by scanning over the range of 5-50° with step of 0.2°/s. Calculated patterns were generated with Mercury. The luminescence spectra were measured using an Edinburgh Instrument FLS980 Combined Fluorescence Lifetime and Steady State Spectrometer. The steady-state luminescence was excited by unpolarized light from a 450 W xenon CW lamp at 298 K and 15 K. The lifetime measurements were excited by a pulsed  $\mu$ s flash lamp at 298 K. Magnetic susceptibility measurements were performed with a Quantum Design MPMS-XL7 SQUID. Polycrystalline samples were embedded in vaseline to prevent torquing. Data were corrected for the diamagnetic contribution calculated from Pascal constants.

**X-ray Structure Determination.** Diffraction intensities were collected on a Rigaku R-Axis SPIDER IP diffractometer with Mo K $\alpha$  radiation ( $\lambda$  = 0.71073 Å) for complexes **1** and **2** at 150(2) K. The structures were solved by direct methods, and all non-hydrogen atoms were refined anisotropically by least-squares on  $F^2$  using the SHELXTL program suite.<sup>2</sup> Anisotropic thermal parameters were assigned to all non-hydrogen atoms. The hydrogen atoms attached to carbon, nitrogen and oxygen atoms were placed in idealised positions and refined using a riding model to the atom to which they were attached. The disordered solvent molecules were squeezed<sup>3</sup> and reconfirmed by the elemental analysis. CCDC 1426946 (**1**) and 1426947 (**2**) contain the supplementary crystallographic data for this paper. These data can be obtained free of charge via [www.ccdc.cam.ac.uk/conts/retrieving.html](http://www.ccdc.cam.ac.uk/conts/retrieving.html).

**Synthesis.** Dy(N<sub>5</sub>)<sub>2</sub>(CF<sub>3</sub>SO<sub>3</sub>)<sub>3</sub> (**1**): A mixture of 2,6-diacetyl pyridine (0.10 mmol) and 2-diazanyl pyridine (0.20 mmol) was dissolved in 6 mL acetonitrile. Under stirring, the solution was turned yellow. After 30 minutes, Dy(CF<sub>3</sub>SO<sub>3</sub>)<sub>3</sub> (0.05 mmol) was added and the mixture was stirred for 30 minutes. Yellow crystals suitable for X-ray analysis were obtained in several days by slow diffusion of diethyl ether into the solution above. Elemental analysis (%) for C<sub>41</sub>H<sub>38</sub>DyF<sub>9</sub>N<sub>14</sub>O<sub>9</sub>S<sub>3</sub>, calcd, C: 37.87, H: 2.95, N: 15.08, S: 7.40; found, C: 37.77, H: 3.02, N: 15.22, S: 7.37.

Dy(N<sub>5</sub>)<sub>2</sub>(CF<sub>3</sub>SO<sub>3</sub>)<sub>3</sub> (**2**): the procedure was the same as that employed for complex **1**, except that pyridine was replaced by metal salts. The yellow crystals were obtained by slow diffusion of diethyl ether into the solution. Elemental analysis (%) for C<sub>41</sub>H<sub>38</sub>ErF<sub>9</sub>N<sub>14</sub>O<sub>9</sub>S<sub>3</sub>, calcd, C: 37.73, H: 2.93, N: 15.02, S: 7.37; found, C: 38.16, H: 3.10, N: 15.34; S: 7.22.

### Reference:

- [1] J. D. Curry, M. A. Robinson and D. H. Busch, *Inorg. Chem.*, 1967, **6**, 1570.
- [2] G. M. Sheldrick, *Acta Crystallogr.*, 2008, **A64**, 112.
- [3] P. van der Sluis and A. L. Spek, *Acta Crystallogr.*, 1990, **A46**, 194.

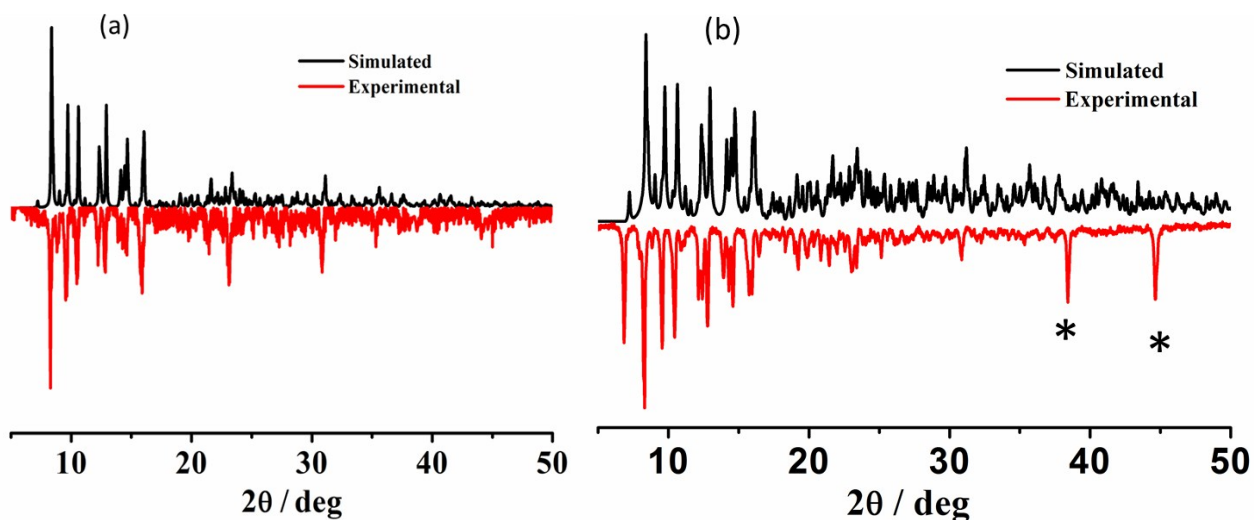

**Figure S1.** Experimental and simulated powder X-ray diffraction (PXRD) patterns for **1** (a) and **2** (b). The peaks marked with \* were due to silicon carrier.

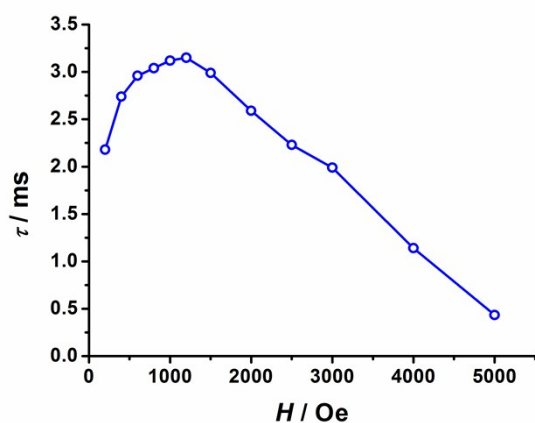

**Figure S2.** The dc field dependence of the relaxation time for **1** at 1.8K. The solid line is a guide for the eye.

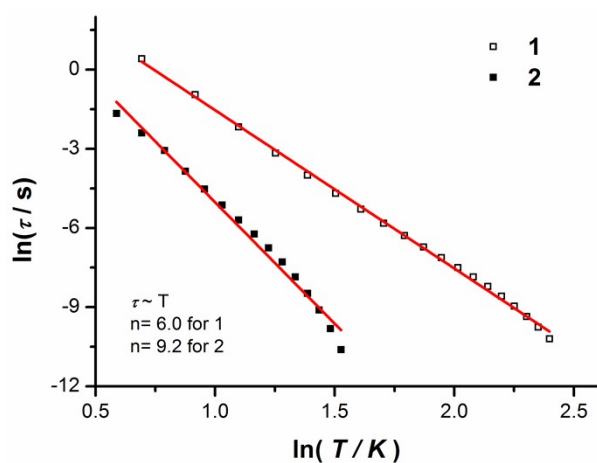

**Figure S3.** The plots of the relaxation time  $\tau$  vs.  $T$  on a log-log scale for **1** and **2**. The red lines are for the best linear fitting.

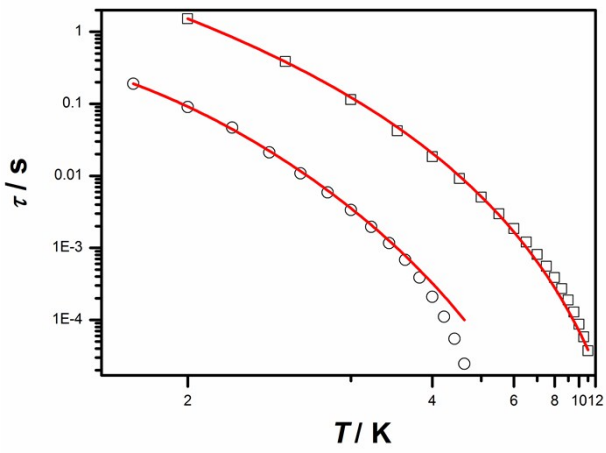

**Figure S4.** The plots of the relaxation time  $\tau$  vs.  $T$  with consideration of the direct and Raman processes for **1** (*square*) and **2** (*circle*). The red lines are fitted with the equation:  $\tau^{-1} = AT + BT^n$ .

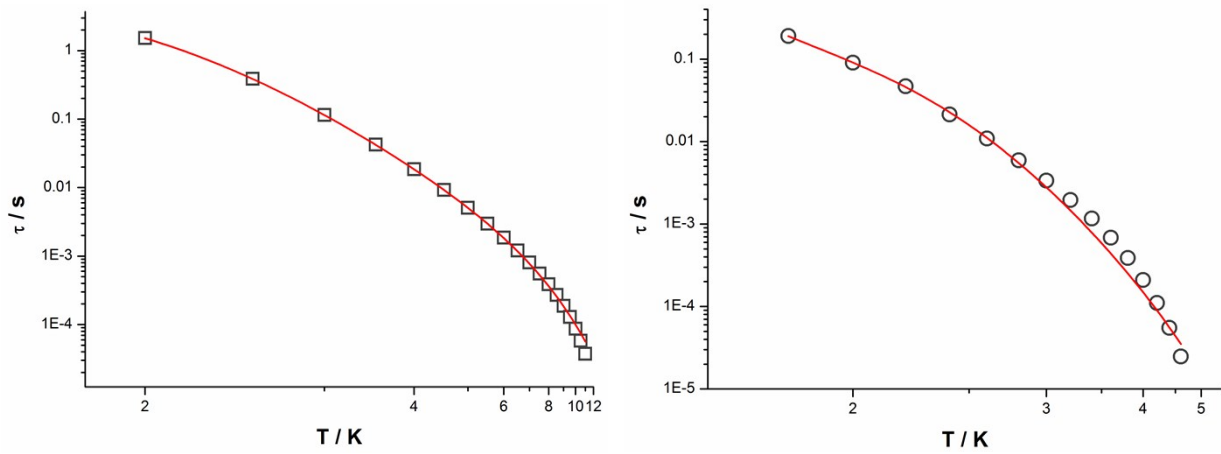

**Figure S5.** The plots of the relaxation time  $\tau$  vs.  $T$  with consideration of the direct, Raman, and Obach processes for **1** (*square*) and **2** (*circle*). The red lines are fitted with the equation:  $\tau^{-1} = AT + BT^n + \tau_0^{-1} \exp(-U_{\text{eff}}/k_B T)$ .

**Table S1.** Crystallographic Data and Structural Refinements for **1** and **2**.

| compound                                    | <b>1</b>                                                                                       | <b>2</b>                                                                                       |
|---------------------------------------------|------------------------------------------------------------------------------------------------|------------------------------------------------------------------------------------------------|
| Formula                                     | C <sub>41</sub> H <sub>38</sub> DyF <sub>9</sub> N <sub>14</sub> O <sub>9</sub> S <sub>3</sub> | C <sub>41</sub> H <sub>38</sub> ErF <sub>9</sub> N <sub>14</sub> O <sub>9</sub> S <sub>3</sub> |
| $M_r$                                       | 1300.53                                                                                        | 1305.29                                                                                        |
| Temp. / K                                   | 150(2)                                                                                         | 150(2)                                                                                         |
| Crystal system                              | orthorhombic                                                                                   | orthorhombic                                                                                   |
| Space group                                 | <i>Pbca</i>                                                                                    | <i>Pbca</i>                                                                                    |
| $a / \text{\AA}$                            | 20.8179(9)                                                                                     | 20.6900(4)                                                                                     |
| $b / \text{\AA}$                            | 19.5864(10)                                                                                    | 19.5456(5)                                                                                     |
| $c / \text{\AA}$                            | 24.4923(13)                                                                                    | 24.4270(5)                                                                                     |
| $\alpha / \text{\AA}$                       | 90                                                                                             | 90                                                                                             |
| $\beta / \text{\AA}$                        | 90                                                                                             | 90                                                                                             |
| $\gamma / \text{\AA}$                       | 90                                                                                             | 90                                                                                             |
| $V / \text{\AA}^3$                          | 9986.7(9)                                                                                      | 9878.2(4)                                                                                      |
| $Z$                                         | 8                                                                                              | 8                                                                                              |
| $\rho_{\text{calcd.}}$ (g/cm <sup>3</sup> ) | 1.730                                                                                          | 1.755                                                                                          |
| $\mu$ (mm <sup>-1</sup> )                   | 1.724                                                                                          | 1.929                                                                                          |
| $F(000)$                                    | 5192.0                                                                                         | 5208.0                                                                                         |
| Reflns obsd [ $I \geq 2\sigma(I)$ ]         | 9543                                                                                           | 9543                                                                                           |
| GOF on $F^2$                                | 1.052                                                                                          | 1.038                                                                                          |
| $R_1$ [ $I \geq 2\sigma(I)$ ] <sup>a</sup>  | 0.0649(6407)                                                                                   | 0.0475(8890)                                                                                   |
| $wR_2$ (all data) <sup>b</sup>              | 0.1750(11325)                                                                                  | 0.1200(10620)                                                                                  |
| CCDC No.                                    | 1426946                                                                                        | 1426947                                                                                        |

<sup>a</sup>  $R_1 = \sum ||F_o| - |F_c|| / \sum |F_o|$ . <sup>b</sup>  $wR_2 = [\sum w(F_o^2 - F_c^2)^2 / \sum w(F_o^2)^2]^{1/2}$ .

**Table S2.** Selected bond lengths (Å) and bond angles (°) for **1**.

| Length(Å) |            | Length(Å)  |            |
|-----------|------------|------------|------------|
| Dy-N1     | 2.564(6)   | Dy-N8      | 2.571(6)   |
| Dy-N2     | 2.526(6)   | Dy-N9      | 2.563(6)   |
| Dy-N4     | 2.554(6)   | Dy-N11     | 2.609(6)   |
| Dy-N5     | 2.551(6)   | Dy-N12     | 2.555(6)   |
| Dy-N7     | 2.585(6)   | Dy-N14     | 2.586(6)   |
| Angle(°)  |            | Angle(°)   |            |
| N1-Dy-N2  | 61.3(2)    | N4-Dy-N14  | 73.6(2)    |
| N1-Dy-N4  | 112.9(2)   | N5-Dy-N7   | 60.82(19)  |
| N1-Dy-N5  | 61.71(18)  | N5-Dy-N8   | 117.15(18) |
| N1-Dy-N7  | 112.72(19) | N5-Dy-N9   | 135.14(19) |
| N1-Dy-N8  | 178.75(17) | N5-Dy-N11  | 85.06(19)  |
| N1-Dy-N9  | 119.64(19) | N5-Dy-N12  | 74.12(19)  |
| N1-Dy-N11 | 68.39(19)  | N5-Dy-N14  | 76.8(2)    |
| N1-Dy-N12 | 117.7(2)   | N7-Dy-N8   | 66.63(18)  |
| N1-Dy-N14 | 67.75(19)  | N7-Dy-N9   | 82.21(18)  |
| N2-Dy-N4  | 61.5(2)    | N7-Dy-N11  | 74.80(19)  |
| N2-Dy-N5  | 123.0(2)   | N7-Dy-N12  | 75.54(19)  |
| N2-Dy-N7  | 147.68(18) | N7-Dy-N14  | 125.76(19) |
| N2-Dy-N8  | 119.82(19) | N8-Dy-N9   | 61.46(19)  |
| N2-Dy-N9  | 75.7(2)    | N8-Dy-N11  | 112.2(2)   |
| N2-Dy-N11 | 73.76(19)  | N8-Dy-N12  | 61.2(2)    |
| N2-Dy-N12 | 136.53(19) | N8-Dy-N14  | 111.67(19) |
| N2-Dy-N14 | 83.2(2)    | N9-Dy-N11  | 59.8(2)    |
| N4-Dy-N5  | 149.16(19) | N9-Dy-N12  | 122.7(2)   |
| N4-Dy-N7  | 134.4(2)   | N9-Dy-N14  | 147.9(2)   |
| N4-Dy-N8  | 67.7(2)    | N11-Dy-N12 | 149.42(19) |
| N4-Dy-N9  | 75.19(19)  | N11-Dy-N14 | 136.1(2)   |
| N4-Dy-N11 | 122.68(19) | N12-Dy-N14 | 60.7(2)    |
| N4-Dy-N12 | 84.10(19)  |            |            |

**Table S3.** Selected bond lengths (Å) and bond angles (°) for **2**.

| Length(Å) |          | Length(Å)  |          |
|-----------|----------|------------|----------|
| Er-N1     | 2.539(4) | Er-N8      | 2.547(4) |
| Er-N2     | 2.499(4) | Er-N9      | 2.536(4) |
| Er-N4     | 2.543(4) | Er-N11     | 2.594(4) |
| Er-N5     | 2.527(4) | Er-N12     | 2.527(4) |
| Er-N7     | 2.559(4) | Er-N14     | 2.556(4) |
| Angle(°)  |          | Angle(°)   |          |
| N1-Er-N2  | 61.7(1)  | N4-Er-N14  | 73.2(1)  |
| N1-Er-N4  | 113.1(1) | N5-Er-N7   | 60.8(1)  |
| N1-Er-N5  | 61.8(1)  | N5-Er-N8   | 117.0(1) |
| N1-Er-N7  | 112.7(1) | N5-Er-N9   | 135.3(1) |
| N1-Er-N8  | 178.7(1) | N5-Er-N11  | 84.2(1)  |
| N1-Er-N9  | 119.5(1) | N5-Er-N12  | 73.8(1)  |
| N1-Er-N11 | 68.0(1)  | N5-Er-N14  | 77.2(1)  |
| N1-Er-N12 | 117.5(1) | N7-Er-N8   | 66.6(1)  |
| N1-Er-N14 | 67.9(1)  | N7-Er-N9   | 82.4(1)  |
| N2-Er-N4  | 61.6(1)  | N7-Er-N11  | 74.3(1)  |
| N2-Er-N5  | 123.4(1) | N7-Er-N12  | 75.6(1)  |
| N2-Er-N7  | 147.4(1) | N7-Er-N14  | 126.2(1) |
| N2-Er-N8  | 119.6(1) | N8-Er-N9   | 61.5(1)  |
| N2-Er-N9  | 75.2(1)  | N8-Er-N11  | 112.5(1) |
| N2-Er-N11 | 74.2(1)  | N8-Er-N12  | 61.5(1)  |
| N2-Er-N12 | 136.7(1) | N8-Er-N14  | 111.7(1) |
| N2-Er-N14 | 83.2(1)  | N9-Er-N11  | 60.6(1)  |
| N4-Er-N5  | 149.0(1) | N9-Er-N12  | 123.0(1) |
| N4-Er-N7  | 134.2(1) | N9-Er-N14  | 147.3(1) |
| N4-Er-N8  | 67.7(1)  | N11-Er-N12 | 148.7(1) |
| N4-Er-N9  | 75.1(1)  | N11-Er-N14 | 135.8(1) |
| N4-Er-N11 | 123.7(1) | N12-Er-N14 | 60.8(1)  |
| N4-Er-N12 | 84.1(1)  |            |          |

**Table S4.** Lanthanide geometry analysis by using Continuous Shape Measurements (CShM).<sup>a</sup>

| Complex  | *JBC ( $D_{4d}$ ) | JSP ( $C_{2v}$ ) | TD ( $C_{2v}$ ) |
|----------|-------------------|------------------|-----------------|
| <b>1</b> | 3.335             | 3.542            | 4.333           |
| <b>2</b> | 3.267             | 3.493            | 4.312           |

\* JBC = bicapped square antiprism; JSP= sphenocorona; TD = tetradecahedron.

<sup>a</sup> (a) S. Alvarez, P. Alemany, D.Casanova, J. Cirera, M. Llunell and D. Avnir, *Coord. Chem. Rev.*, 2005, **249**, 1693; (26) D. Casanova, M. Llunell, P. Alemany and S. Alvarez, *Chem. Eur. J.*, 2005, **11**, 1479.

**Table S5.** Energy levels and eigenstates for compounds **1** and **2** obtained from the fitting of the  $\chi_m T-T$  and  $M-H$  data simultaneously.

|          | Energy / cm <sup>-1</sup> | Eigenstate                                                        |
|----------|---------------------------|-------------------------------------------------------------------|
| <b>1</b> | 0                         | 79%   $\mp 1/2$ > + 18%   $\pm 3/2$ > + 3%   $\mp 5/2$ > + ...    |
|          | 72                        | 79%   $\mp 3/2$ > + 19%   $\pm 1/2$ > + 2%   $\pm 5/2$ > + ...    |
|          | 159                       | 94%   $\mp 5/2$ > + 4%   $\pm 3/2$ > + 1%   $\pm 1/2$ > + ...     |
|          | 290                       | 99%   $\pm 7/2$ > + ...                                           |
|          | 470                       | 61%   $\pm 9/2$ > + 38%   $\mp 9/2$ > + ...                       |
|          | 689                       | 99%   $\pm 11/2$ > + ...                                          |
|          | 973                       | 84%   $\pm 13/2$ > + 15%   $\pm 13/2$ > + ...                     |
|          | 1290                      | 100%   $\pm 15/2$ > + ...                                         |
| <b>2</b> | 0                         | 46%   $\pm 15/2$ > + 44%   $\pm 11/2$ > + 10%   $\pm 7/2$ > + ... |
|          | 166                       | 53%   $\pm 13/2$ > + 41%   $\pm 9/2$ > + 3%   $\pm 5/2$ > + ...   |
|          | 361                       | 41%   $\mp 1/2$ > + 32%   $\pm 3/2$ > + 19%   $\mp 5/2$ > + ...   |
|          | 915                       | 54%   $\pm 7/2$ > + 32%   $\pm 15/2$ > + 7%   $\mp 5/2$ > + ...   |
|          | 1204                      | 57%   $\pm 5/2$ > + 27%   $\mp 3/2$ > + 6%   $\pm 13/2$ > + ...   |
|          | 1438                      | 38%   $\pm 9/2$ > + 31%   $\pm 13/2$ > + 11%   $\mp 3/2$ > + ...  |
|          | 1598                      | 44%   $\pm 11/2$ > + 29%   $\pm 7/2$ > + 15%   $\pm 15/2$ > + ... |
|          | 1692                      | 32%   $\pm 1/2$ > + 14%   $\mp 3/2$ > + 16%   $\mp 1/2$ > + ...   |
